# Supplementary material for: Indication of Cross-Species Transmission of Astrovirus Associated with Encephalitis in Sheep and Cattle
Source: PubMed Central journal article supplement (PMC5572871; doi:10.3201/eid2309.170168), 2017-09
Supplement: 17-0168-Techapp-s1.pdf [file 17-0168-Techapp-s1.pdf]

# Indication of Cross-Species Transmission of Astrovirus Associated with Encephalitis in Sheep and Cattle

## Technical Appendix

### Tissue Samples

Sheep tissue samples were collected in the framework of a neuropathological survey in the small ruminant population in Switzerland in 2004 and 2005 (1). Whole brains of sheep and goats that died on farm for unknown reasons were collected according to a standardized procedure. Brains were cut sagittally into two equal halves. One half was stored at  $-20^{\circ}\text{C}$  for the purpose of molecular testing. The other half was fixed in formalin, and representative brain regions were paraffin embedded and processed for histopathology. Brain sections were then HE stained and examined for histopathological lesions indicative of neurologic disease. Those samples with lesions consistent with a viral infection of the brain, i.e., a nonsuppurative inflammatory pattern, were further tested for common viral pathogens associated with encephalitis in sheep and goats (small ruminant lentiviruses, Borna virus, rabies virus). Tissues were archived in the Biobank of the Division of Neurologic Sciences, Vetsuisse Faculty, University of Bern, until further analysis in the current study.

### Next-Generation Sequencing

DNA and RNA extracts from frozen brain tissues of 3 sheep diagnosed with severe nonsuppurative encephalitis, but with negative test results for the above-mentioned viruses, were processed to next-generation-sequencing libraries separately (2). Libraries were sequenced in an Illumina HiSeq using 1 lane of paired-end 150 bp reads, with yields of 177,146,907–195,143,918 reads for the DNA extracts and 113,160,073–251,062,995 reads for the RNA extracts. The reads of the DNA libraries were mapped to the *Ovis aries* reference genome (version 3.1) using Bowtie 2 (version 2.2.4) (3) and the reads of the RNA libraries were mapped to the *Ovis aries* reference

genome (version 3.1) using STAR (version 2.5.0b) (4). The reads that did not align to the reference genome were quality trimmed using Trimmomatic (version 0.33, option: SLIDINGWINDOW:4:14 MINLEN:127) (5). The trimmed reads were assembled using SPAdes (version 3.9.0, options:–meta -k 21,33,55,77,99,127) (6). The resulting assembly was subsequently analyzed using the virus discovery pipeline described by Wüthrich et al. (7).

## **Sanger Sequencing**

The whole genome length of the virus was Sanger sequenced with primers that were designed on the sequence of BoAstV-CH15. Briefly, RNA was extracted from brain tissue of animal 41669 with TRI reagent (Sigma-Aldrich). Using primers BoAstV 15 2do, BoAstV 15 3do, BoAstV 15 q1do, BoAstV 15 q2do (Technical Appendix Table 3), and oligo(dT), viral RNA was reverse transcribed with ThermoScript Reverse Transcriptase (Life Technologies). Using different combinations of primers recognizing sequences scattered over the whole genome length of BoAstV-CH15, binding on both strands of the cDNA and spaced apart from one another with ~500 nt (the sequence of those primers are available on demand), PCR amplified fragments were directly sequenced in both directions, until the whole genome sequence of the new virus was covered.

## **Sequence Comparisons and Phylogenetic Analysis**

The obtained full-length sequence was compared with full-length sequences of BoAstV-CH15 (8), BoAstV-BH89/14 (9), OvAstV-UK/2013/ewe/lib01454 and OvAstV-UK/2014/lamb/lib01455 (10), and 2 ovine astrovirus strains that were detected in feces samples of sheep (11, 12) (Technical Appendix Table 1 and Technical Appendix Figure 2), using the alignment function of the Geneious software Version 9.1.5 (Biomatters). The phylogenetic tree was constructed from amino acid sequences of the astrovirus capsid proteins by maximum-likelihood using the PHYML plug-in in Geneious with 100 bootstraps.

## **RT-PCR Screening**

Forty-seven brain homogenates of sheep diagnosed with nonsuppurative encephalitis, which were available in our archives from another study (1), were tested by RT-PCR with

primers BoAstV CH15 3fo and BoAstV CH15 3do (8) (Technical Appendix Table 2) using the OneTaq One-Step RT-PCR Kit (New England Biolabs), with the alternative protocol described by the manufacturer. Cycling conditions were as follows: 48°C for 15 min, 94°C for 1 min, 40 cycles of 94°C for 15 sec, 52°C for 30 sec and 68°C for 45 sec, and 68°C for 5 min.

## **Antibody Production**

The methods used to obtain antibodies were the same as those we described previously for another bovine astrovirus, BoAstV-CH13 (13). Briefly, rabbits were immunized with recombinant viral proteins expressed in bacteria and the resulting hyperimmune serum samples were collected and affinity purified. Only diverging elements will be mentioned here. First, because structural proteins are usually produced in greater amounts than nonstructural ones during viral replication, we chose only 2 regions on the corresponding putative open reading frame (ORF), ORF2, similar to ORF2-con and ORF2-var described in the previous study. CH15-ORF2-con corresponds to the conserved region, and N-terminal part of protein Vp90, CH15-ORF2-var to a more variable, more C-terminally located part of this protein (14,15) (Technical Appendix Figure 1). Reverse transcription was performed with oligo(dT). The primers subsequently used to amplify the regions of interest were the following: CH15O2c *NheI* F and CH15O2c *BamHI* R for the CH15-ORF2-con region and CH15O2v *NheI* F and CH15O2v *BamHI* R for CH15-ORF2-var (Technical Appendix Table 3). Lysis of transformed bacteria was performed using 1 mg/l Lysozyme from chicken egg white (Sigma Aldrich), and buffers used for protein purification consisted in PBS with 1 M urea, the concentration of imidazole used in the binding/washing buffer being 10 mM and 20 mM, respectively. One rabbit was injected subcutaneously with 50–200 µg of each antigen contained in SDS-PAGE gel pieces (LowDose Antiserum protocol).

## **Immunohistochemistry**

For both antisera, a simple screening with 3 different antigen retrieval methods (microwave heating in citrate buffer at pH 6 and pH 9, proteinase K treatment) and dilutions (1:20, 1:50, 1:100) was sufficient to determine the best performing parameters, which were microwave heating in citrate buffer at pH 6 and 1:50 dilution of the primary antibody, the

protocol being otherwise the same as the one described in another of our studies (13). Each method was tested on case 41669 and a negative control sheep which was negative for OvAstV-CH16 by RT-PCR.

## References

1. Oevermann A, Botteron C, Seuberlich T, Nicolier A, Friess M, Doherr MG, et al. Neuropathological survey of fallen stock: active surveillance reveals high prevalence of encephalitic listeriosis in small ruminants. *Vet Microbiol.* 2008;130:320–9. [PubMed](#)  
<http://dx.doi.org/10.1016/j.vetmic.2008.01.015>
2. Bouzalas IG, Wüthrich D, Walland J, Drögemüller C, Zurbriggen A, Vandeveld M, et al. Neurotropic astrovirus in cattle with nonsuppurative encephalitis in Europe. *J Clin Microbiol.* 2014;52:3318–24. [PubMed](#) <http://dx.doi.org/10.1128/JCM.01195-14>
3. Langmead B, Salzberg SL. Fast gapped-read alignment with Bowtie 2. *Nat Methods.* 2012;9:357–9. [PubMed](#) <http://dx.doi.org/10.1038/nmeth.1923>
4. Dobin A, Davis CA, Schlesinger F, Drenkow J, Zaleski C, Jha S, et al. STAR: ultrafast universal RNA-seq aligner. *Bioinformatics.* 2013;29:15–21. [PubMed](#)  
<http://dx.doi.org/10.1093/bioinformatics/bts635>
5. Bolger AM, Lohse M, Usadel B. Trimmomatic: a flexible trimmer for Illumina sequence data. *Bioinformatics.* 2014;30:2114–20. [PubMed](#) <http://dx.doi.org/10.1093/bioinformatics/btu170>
6. Bankevich A, Nurk S, Antipov D, Gurevich AA, Dvorkin M, Kulikov AS, et al. SPAdes: a new genome assembly algorithm and its applications to single-cell sequencing. *J Comput Biol.* 2012;19:455–77. [PubMed](#) <http://dx.doi.org/10.1089/cmb.2012.0021>
7. Wüthrich D, Boujon CL, Truchet L, Selimovic-Hamza S, Oevermann A, Bouzalas IG, et al. Exploring the virome of cattle with non-suppurative encephalitis of unknown etiology by metagenomics. *Virology.* 2016;493:22–30. [PubMed](#) <http://dx.doi.org/10.1016/j.virol.2016.03.009>
8. Seuberlich T, Wüthrich D, Selimovic-Hamza S, Drögemüller C, Oevermann A, Bruggmann R, et al. Identification of a second encephalitis-associated astrovirus in cattle. *Emerg Microbes Infect.* 2016;5:e5. [PubMed](#) <http://dx.doi.org/10.1038/emi.2016.5>
9. Schlottau K, Schulze C, Bilk S, Hanke D, Höper D, Beer M, et al. Detection of a novel bovine astrovirus in a cow with encephalitis. *Transbound Emerg Dis.* 2016;63:253–9. [PubMed](#)  
<http://dx.doi.org/10.1111/tbed.12493>

10. Pfaff F, Schlottau K, Scholes S, Courtenay A, Hoffmann B, Höper D, et al. A novel astrovirus associated with encephalitis and ganglionitis in domestic sheep. *Transbound Emerg Dis*. 2017;64:677–82. [PubMed](https://pubmed.ncbi.nlm.nih.gov/312623/) <http://dx.doi.org/10.1111/tbed.12623>
11. Jonassen CM, Jonassen TØ, Sveen TM, Grinde B. Complete genomic sequences of astroviruses from sheep and turkey: comparison with related viruses. *Virus Res*. 2003;91:195–201. [PubMed](https://pubmed.ncbi.nlm.nih.gov/12691/) [http://dx.doi.org/10.1016/S0168-1702\(02\)00269-1](http://dx.doi.org/10.1016/S0168-1702(02)00269-1)
12. Reuter G, Pankovics P, Delwart E, Boros Á. Identification of a novel astrovirus in domestic sheep in Hungary. *Arch Virol*. 2012;157:323–7. [PubMed](https://pubmed.ncbi.nlm.nih.gov/2211514/) <http://dx.doi.org/10.1007/s00705-011-1151-4>
13. Boujon CL, Selimovic-Hamza S, Bouzalas I, Seuberlich T. Development and validation of an immunohistochemistry procedure for the detection of a neurotropic bovine astrovirus. *J Virol Methods*. 2017;239:26–33. [PubMed](https://pubmed.ncbi.nlm.nih.gov/28013/) <http://dx.doi.org/10.1016/j.jviromet.2016.10.013>
14. Wang QH, Kakizawa J, Wen LY, Shimizu M, Nishio O, Fang ZY, et al. Genetic analysis of the capsid region of astroviruses. *J Med Virol*. 2001;64:245–55. [PubMed](https://pubmed.ncbi.nlm.nih.gov/11043/) <http://dx.doi.org/10.1002/jmv.1043>
15. Bass DM, Qiu S. Proteolytic processing of the astrovirus capsid. *J Virol*. 2000;74:1810–4. [PubMed](https://pubmed.ncbi.nlm.nih.gov/112000/) <http://dx.doi.org/10.1128/JVI.74.4.1810-1814.2000>

**Technical Appendix Table 1.** Pairwise sequence similarities of neurotropic astrovirus strains in ruminants.

| ORF                 | Nucleotide / amino acid similarity, % |             |                     |             |             |             |              |
|---------------------|---------------------------------------|-------------|---------------------|-------------|-------------|-------------|--------------|
|                     | BoAstV-BH89/14                        | BoAstV-CH15 | <b>OvAstV-CH16*</b> | OvAstV-1    | OvAstV-2    | UK/2013/ewe | UK/2014/lamb |
| <i>ORF 1a</i>       |                                       |             |                     |             |             |             |              |
| BoAstV-BH89/14      | -                                     | 98.6        | <b>98.5</b>         | 72.7        | n.a.        | 98.8        | 98.9         |
| BoAstV-CH15         | 91.1                                  | -           | <b>98.9</b>         | 72.2        | n.a.        | 98.6        | 98.5         |
| <b>OvAstV-CH16*</b> | <b>91.4</b>                           | <b>98.3</b> | -                   | <b>72.5</b> | <b>n.a.</b> | <b>98.2</b> | <b>98.3</b>  |
| OvAstV-1            | 68.0                                  | 67.6        | <b>67.8</b>         | -           | n.a.        | 72.2        | 72.3         |
| OvAstV-2            | n.a.                                  | n.a.        | <b>n.a.</b>         | n.a.        | -           | n.a.        | n.a.         |
| UK/2013/ewe         | 94.3                                  | 91.4        | <b>91.5</b>         | 68.0        | n.a.        | -           | 99.9         |
| UK/2014/lamb        | 94.4                                  | 91.3        | <b>91.6</b>         | 68.0        | n.a.        | 99.7        | -            |
| <i>ORF1ab</i>       |                                       |             |                     |             |             |             |              |
| BoAstV-BH89/14      | -                                     | 99.0        | <b>98.9</b>         | 76.6        | n.a.        | 99.0        | 76.6         |
| BoAstV-CH15         | 92.4                                  | -           | <b>99.2</b>         | 76.3        | n.a.        | 98.7        | 98.6         |
| <b>OvAstV-CH16</b>  | <b>92.3</b>                           | <b>98.6</b> | -                   | <b>76.6</b> | <b>n.a.</b> | <b>98.5</b> | <b>98.5</b>  |
| OvAstV-1            | 70.0                                  | 70.4        | <b>70.2</b>         | -           | n.a.        | 76.5        | 76.6         |
| OvAstV-2            | n.a.                                  | n.a.        | <b>n.a.</b>         | n.a.        | -           | n.a.        | n.a.         |
| UK/2013/ewe         | 94.3                                  | 91.8        | <b>91.8</b>         | 70.0        | n.a.        | -           | 99.9         |
| UK/2014/lamb        | 94.3                                  | 92.1        | <b>92.1</b>         | 70.0        | n.a.        | 99.9        | -            |
| <i>ORF2</i>         |                                       |             |                     |             |             |             |              |
| BoAstV-BH89/14      | -                                     | 98.7        | <b>99.3</b>         | 72.2        | 26.3        | 95.0        | 95.1         |
| BoAstV-CH15         | 94.9                                  | -           | <b>99.0</b>         | 72.2        | 26.2        | 94.6        | 94.7         |
| <b>OvAstV-CH16</b>  | <b>94.7</b>                           | <b>99.3</b> | -                   | <b>72.5</b> | <b>26.2</b> | <b>95.0</b> | <b>95.1</b>  |
| OvAstV-1            | 69.3                                  | 69.5        | <b>69.4</b>         | -           | 23.8        | 73.1        | 73.3         |
| OvAstV-2            | 41.0                                  | 41.5        | <b>41.6</b>         | 40.3        | -           | 25.1        | 25.3         |
| UK/2013/ewe         | 87.9                                  | 88.3        | <b>88.3</b>         | 69.8        | 42.0        | -           | 99.9         |
| UK/2014/lamb        | 87.9                                  | 88.3        | <b>88.2</b>         | 69.7        | 42.0        | 99.9        | -            |

ORF: open reading frame. White cells: nucleotide similarity. Grey cells: amino acid similarity.

\*Ovine astrovirus-CH16 (OvAstV CH16, in bold) shows high similarities with the neurotropic bovine astrovirus strains (BoAstV-BH89/14, BoAstV-CH15) and the neurotropic ovine strains (UK/2013/ewe, UK/2014/lamb), but not with the ovine feces strains (OvAstV-1, OvAstV-2).

**Technical Appendix Table 2.** Amino acid polymorphisms among neurotropic astrovirus strains in ruminants

| <i>nsp1ab</i> | BoAstV-CH15 | BoAstV-BH89/14 | UK/2013/ewe | UK/2014/lamb | OvAstV-CH16 |
|---------------|-------------|----------------|-------------|--------------|-------------|
| a.a.          |             |                |             |              |             |
| 35            | A           | S              | S           | S            | A           |
| 104           | A           | V              | A           | A            | A           |
| 110           | R           | K              | K           | K            | R           |
| 211           | I           | F              | I           | I            | I           |
| 212           | M           | V              | V           | V            | V           |
| 223           | Q           | R              | Q           | Q            | Q           |
| 253           | M           | V              | M           | M            | M           |
| 258           | K           | N              | N           | N            | N           |
| 264           | T           | T              | A           | A            | T           |
| 301           | Y           | Y              | Y           | Y            | H           |
| 457           | S           | S              | P           | P            | S           |
| 476           | H           | H              | Y           | Y            | H           |
| 497           | A           | A              | V           | V            | A           |
| 581           | G           | V              | V           | V            | V           |
| 584           | I           | I              | T           | T            | I           |
| 631           | A           | T              | T           | T            | T           |
| 652           | A           | T              | T           | T            | A           |
| 689           | Y           | Y              | Y           | Y            | H           |
| 694           | E           | E              | E           | E            | D           |
| 848           | A           | A              | A           | A            | V           |
| 928           | N           | N              | D           | D            | N           |
| 952           | D           | D              | D           | D            | E           |
| 1081          | V           | V              | I           | I            | V           |
| 1191          | M           | I              | I           | I            | M           |
| 1200          | N           | N              | N           | N            | S           |
| 1127          | S           | S              | A           | A            | S           |
| <i>capsid</i> | BoAstV-CH15 | BoAstV-BH89/14 | UK/2013/ewe | UK/2014/lamb | OvAstV-CH16 |
| a.a.          |             |                |             |              |             |
| 34            | N           | N              | I           | I            | N           |
| 40            | A           | A              | S           | S            | A           |
| 46            | T           | T              | A           | A            | T           |
| 48            | P           | S              | P           | P            | S           |
| 50            | I           | I              | F           | F            | I           |
| 52            | A           | A              | T           | T            | A           |
| 54            | F           | F              | S           | S            | F           |
| 55            | V           | V              | I           | I            | V           |
| 164           | V           | V              | A           | A            | V           |
| 185           | I           | T              | T           | T            | I           |
| 302           | S           | F              | S           | S            | S           |
| 400           | T           | T              | A           | A            | T           |
| 413           | C           | Y              | Y           | Y            | Y           |
| 430           | T           | T              | A           | A            | T           |
| 438           | A           | A              | K           | K            | A           |
| 440           | V           | V              | M           | M            | V           |
| 448           | T           | T              | G           | G            | T           |
| 449           | S           | S              | P           | P            | S           |
| 451           | I           | T              | T           | T            | T           |
| 460           | G           | G              | S           | S            | G           |
| 465           | V           | V              | I           | I            | V           |
| 469           | Y           | Y              | F           | F            | Y           |
| 516           | A           | A              | S           | S            | A           |
| 518           | T           | T              | S           | S            | T           |
| 524           | V           | V              | I           | I            | V           |
| 531           | V           | V              | I           | I            | V           |
| 554           | N           | N              | D           | N            | N           |
| 555           | R           | R              | Q           | Q            | R           |
| 563           | E           | E              | D           | D            | E           |
| 564           | T           | T              | P           | P            | T           |
| 565           | S           | S              | A           | A            | S           |
| 575           | M           | M              | I           | I            | M           |
| 579           | Y           | Y              | I           | I            | Y           |
| 580           | G           | G              | N           | N            | G           |
| 582           | T           | T              | A           | A            | T           |
| 588           | I           | I              | V           | V            | I           |
| 590           | V           | V              | F           | F            | V           |
| 596           | I           | I              | F           | F            | I           |
| 625           | K           | R              | K           | K            | K           |

| <i>nsp1ab</i> | BoAstV-CH15 | BoAstV-BH89/14 | UK/2013/ewe | UK/2014/lamb | OvAstV-CH16 |
|---------------|-------------|----------------|-------------|--------------|-------------|
| 635           | T           | T              | S           | S            | T           |
| 664           | S           | N              | N           | N            | N           |
| 732           | I           | I              | I           | I            | V           |
| 754           | P           | S              | S           | S            | S           |

*nsp1ab*: nonstructural precursor protein. *capsid*: capsid precursor protein. a.a.: amino acid position.

**Technical Appendix Table 3.** Primers used in this study

| Primer name             | Sequence (5'-3')                                     | Orientation | Application                                                 |
|-------------------------|------------------------------------------------------|-------------|-------------------------------------------------------------|
| BoAstV 15 2do           | GTC CCT TGA CCA TTG TTG C                            | Reverse     | Reverse transcription                                       |
| BoAstV 15 3fo           | GTC TTG CGC GCT GAG C                                | Forward     | Amplification in screening RT-PCR                           |
| BoAstV 15 3do           | TGG GTA ATT CTC TAA GCT GTA CTT                      | Reverse     | Reverse transcription and amplification in screening RT-PCR |
| BoAstV 15 q1do          | AAG CTC GAA TTC GCT CCT TCT TAA CCT TAG<br>AGT TAA C | Reverse     | Reverse transcription                                       |
| BoAstV 15 q2do          | AGA CTC GAA TTC GGA GGT GTA GGG TAC TGC              | Reverse     | Reverse transcription                                       |
| CH15O2c <i>NheI</i> F   | ATC GAG CTA GCA AGG GAG GAC CAA AGT TTG<br>AC        | Forward     | Amplification of ORF2-con<br>fragment                       |
| CH15O2c <i>Bam</i> HI R | CGA CTG GAT CCA GCC AGC GAT GCA TAT ACA<br>AG        | Reverse     | Amplification of ORF2-con<br>fragment                       |
| CH15O2v <i>NheI</i> F   | ATC GAG CTA GCG ACT TCT CAG CCA GCC CTT G            | Forward     | Amplification of ORF2-var<br>fragment                       |
| CH15O2v <i>Bam</i> HI R | CGA CTG GAT CCT TCT GAG GAC GAC CCA GAC              | Reverse     | Amplification of ORF2-var<br>fragment                       |

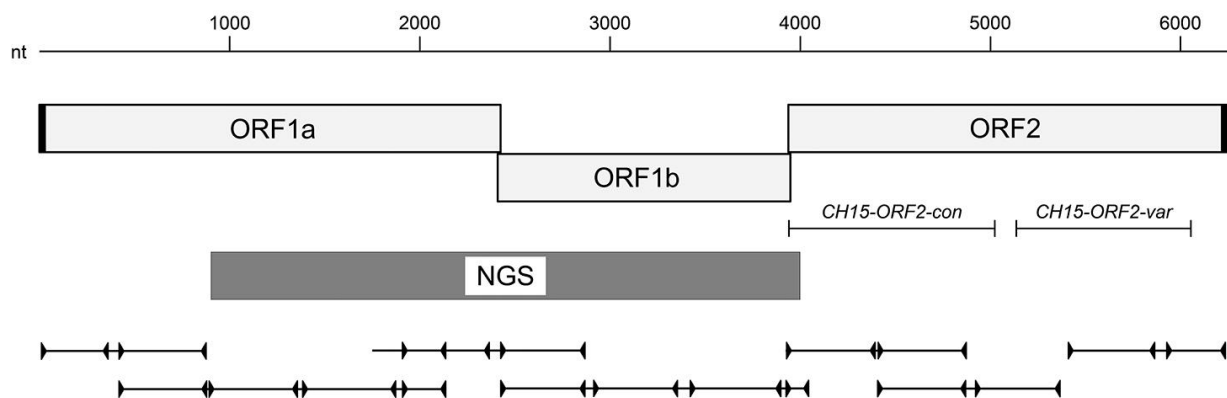

**Technical Appendix Figure 1.** Sequencing information obtained by next-generation sequencing (NGS) investigation of the affected sheep (ID 41669), related to the genomic structure of bovine astrovirus CH15. nt: nucleotide position. ORF: open reading frame. Black rectangles: untranslatable regions. Dark gray rectangle: contiguous sequence (contig) obtained by NGS. Black lines delimited by bars: genome regions used for the expression of recombinant antigens in antibodies production. Black lines with arrow heads: cDNA fragments obtained by reverse transcription and used for Sanger sequencing. Arrow heads: primer binding sites and direction of Sanger sequencing.



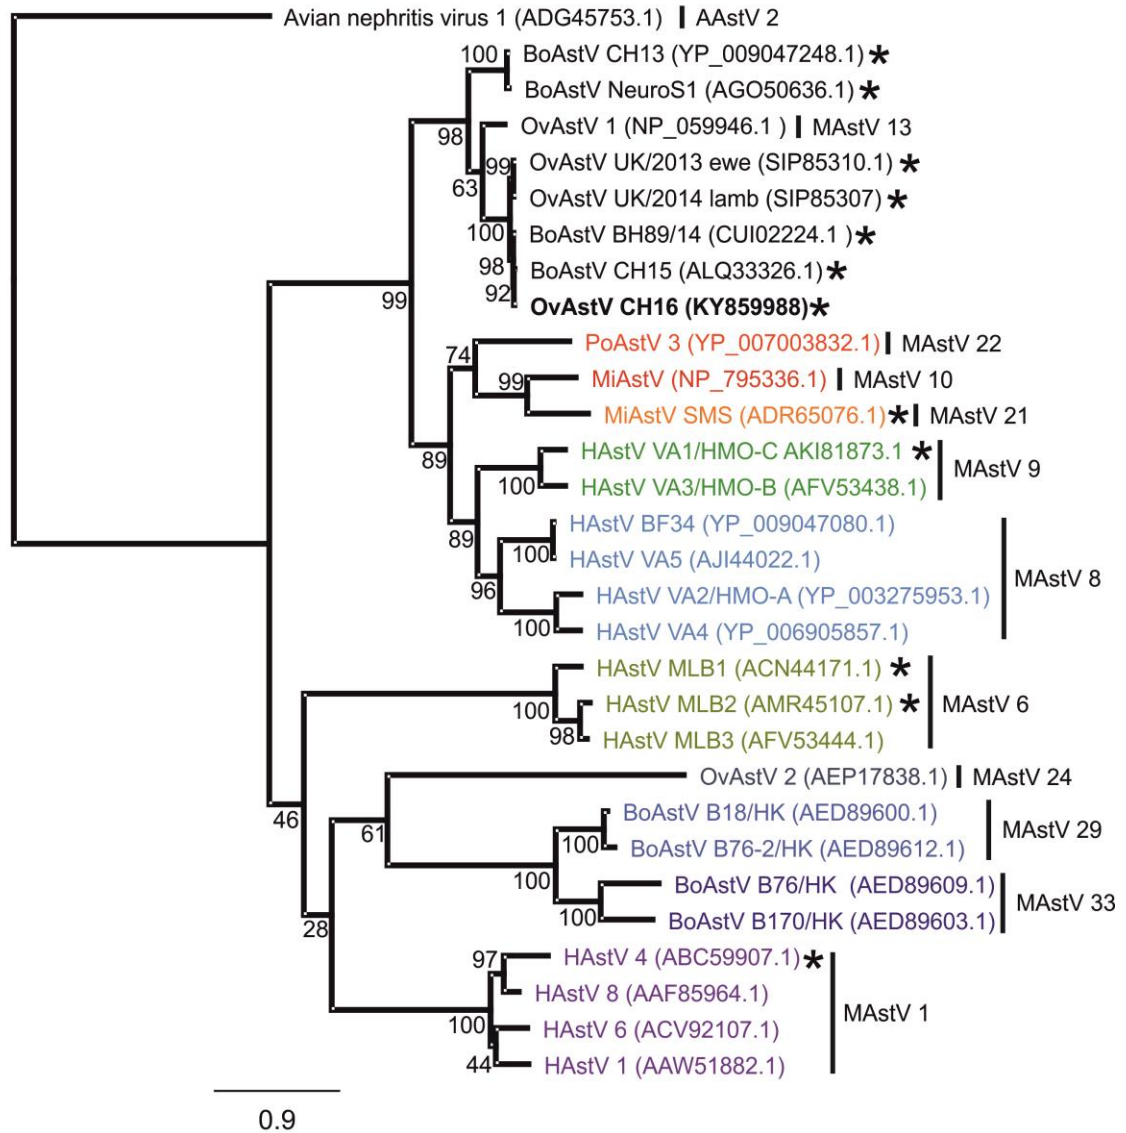

**Technical Appendix Figure 2.** Phylogenetic comparison of the putative capsid protein sequence of representative *Astroviridae* genotype species. The virus found in association with encephalitis in a sheep (OvAstV-CH16) is depicted in bold. Colors indicate viruses that belong to the same astrovirus species. Asterisks signal astrovirus strains that were found in association with encephalitis. HAstV: human astrovirus; PoAstV: porcine astrovirus; MiAstV: mink astrovirus; BoAstV: bovine astrovirus; MAstV: mamastrovirus; AAstV: avastrovirus.

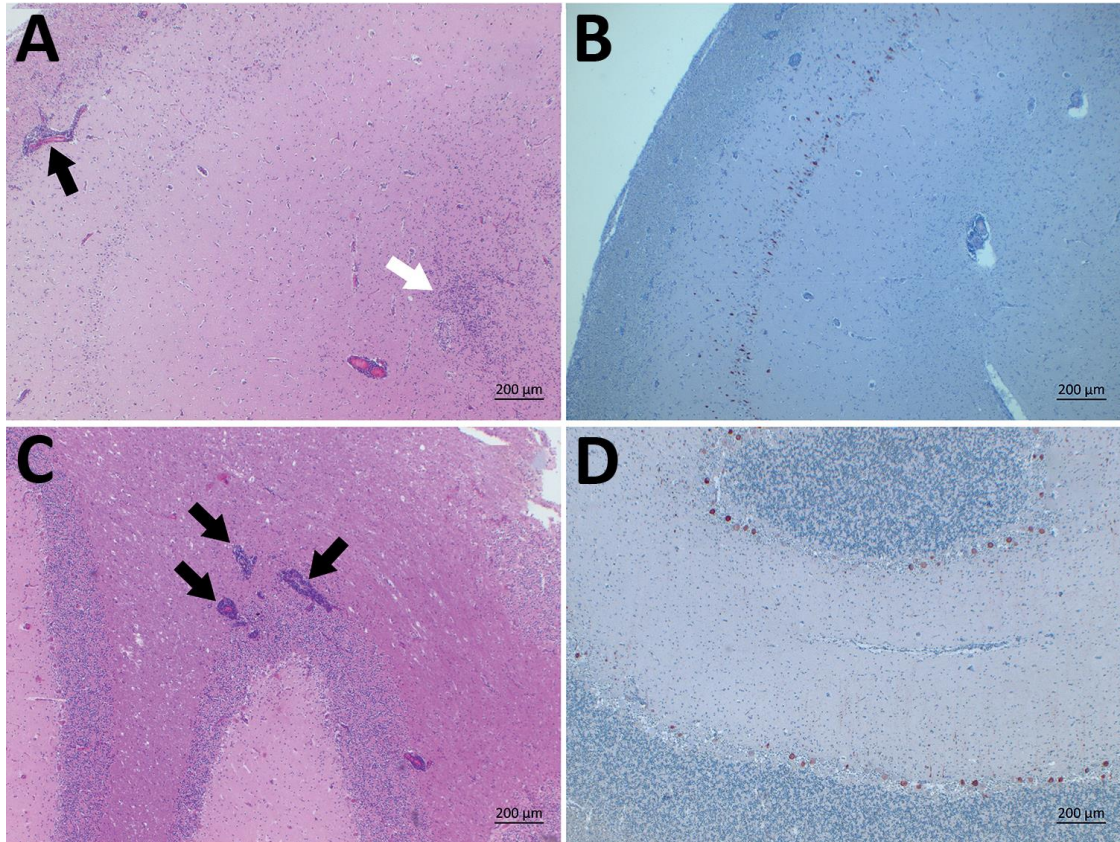

**Technical Appendix Figure 3.** Correlation of histological lesions with immunohistochemistry (IHC) findings in the sheep positive for ovine astrovirus CH16 (ID 41669). A. Hippocampus, hematoxylin-eosin staining. The animal suffered from severe nonsuppurative encephalitis: marked perivascular cuffing (black arrow) and gliosis (white arrow) are characteristic lesions that can be seen here. B. Hippocampus, IHC with the antibodies against the variable region of the putative capsid protein of bovine astrovirus CH15 (BoAstV-CH15). Positive staining is recognizable by dark red coloring. C. Cerebellum, hematoxylin-eosin staining. Black arrows: perivascular cuffing. D. Cerebellum, IHC with the antibodies against the variable region of the putative capsid protein of BoAstV-CH15. Remarkable positive staining of Purkinje cells.
